# Supplementary material for: Effect of charge density of polysaccharides on self-assembled intragastric gelation of whey protein/polysaccharide under simulated gastric conditions
Source: Royal Society of Chemistry journal article supplement (doi:10.1039/c4fo00019f), 2014-01-01

Supplemental Figure 1. Addition of WPI–carrageenan sample to SGF solution for dissolution experiment.

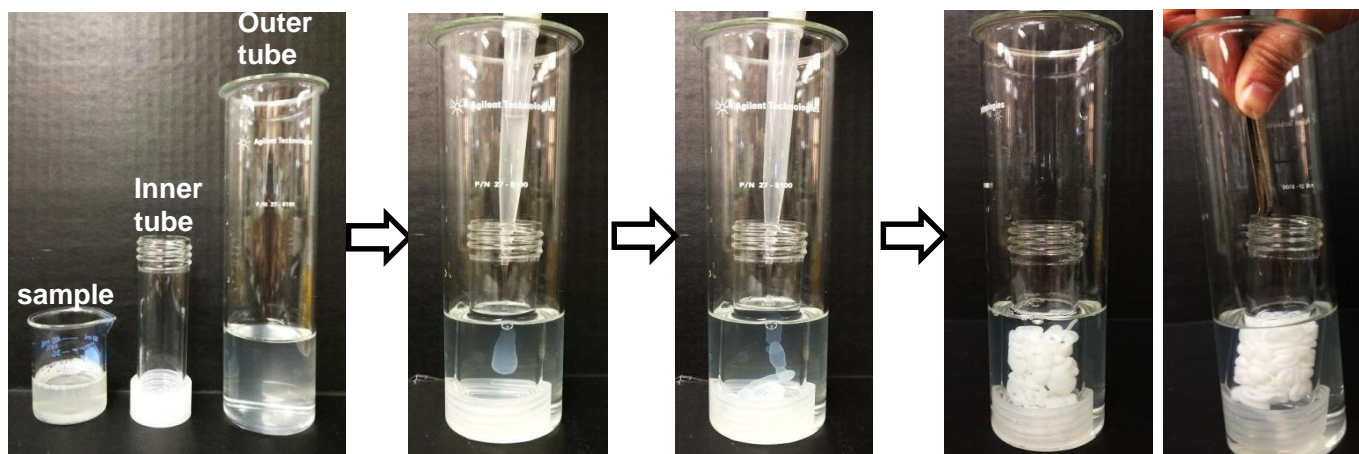

Supplemental Figure 2. Sample preparation using syringe for rheological measurement.

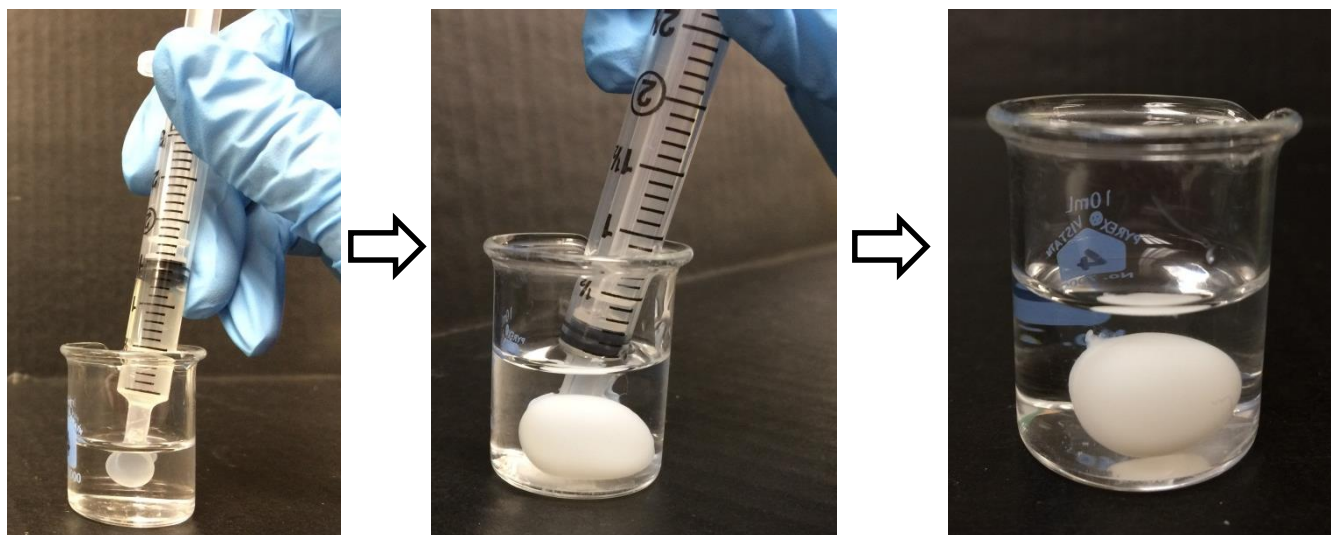

Supplement: c4fo00019f1.pdf [file c4fo00019f1.pdf]
